# Supplementary material for: Polarization modulated upconversion luminescence: single particle vs. few-particle aggregates
Source: Royal Society of Chemistry journal article supplement (doi:10.1039/c5nr00289c), 2015-01-01
Supplement: c5nr00289c1.pdf [file c5nr00289c1.pdf]

# Supporting Information

## **Polarization modulated upconversion luminescence: single particle vs few-particle aggregate**

Ping Chen,<sup>1</sup> Min Song,<sup>2</sup> E Wu,<sup>2</sup> Botao Wu,<sup>2</sup> Jiajia Zhou,<sup>3</sup> Heping Zeng,<sup>2</sup> Xiaofeng Liu,<sup>1,\*</sup>  
Jianrong Qiu<sup>1,4,\*</sup>

<sup>1</sup> School of Materials Science and Engineering, Zhejiang University, Hangzhou 310027, China

<sup>2</sup> State Key Laboratory of Precision Spectroscopy, East China Normal University, Shanghai  
200062, China

<sup>3</sup> College of Materials Science and Engineering, China Jiliang University, Hangzhou 310018,  
China

<sup>4</sup> State Key Laboratory of Luminescent Materials and Devices, South China University of  
Technology, Guangzhou 510640, China

### **Contents:**

#### **1. Experimental Section**

#### **2. Supplementary data, Figure S1-S5**

## 1. Experimental Section

$\text{Y}(\text{NO}_3)_3 \cdot 6\text{H}_2\text{O}$  (99.99%),  $\text{Er}(\text{NO}_3)_3 \cdot 6\text{H}_2\text{O}$  (99.99%) were purchased from Ansheng Inorganic Materials Center (Ganzhou) in China. NaOH,  $\text{NH}_4\text{F}$ , NaF,  $\text{HNO}_3$ , sodium citrate, EDTA, ethanol, 1-octadecene (90%), and oleic acid (90%) were purchased from Sigma-Aldrich. All of the chemicals were used as starting materials without further purification.

### 1.1 Synthesis of $\text{NaYF}_4$ : 5% Er nanodisks

$\text{NaYF}_4$ : 5% Er nanodisks were prepared with a facile and mild hydrothermal process, in which pH value in the reaction system is critical external parameters for determining the architectural features of the  $\beta$ - $\text{NaYF}_4$  nanodisks.<sup>1</sup> In a typical synthesis, an aqueous solution (2.5 mL, 0.2 M) of  $\text{Y}(\text{NO}_3)_3 \cdot 6\text{H}_2\text{O}$  and  $\text{Er}(\text{NO}_3)_3 \cdot 6\text{H}_2\text{O}$  (lanthanide ions molar ratio, Y/Er = 95:5) was mixed with an aqueous solution of sodium citrate (22.5 mL, 2.08 M) under stirring for 30 min to form a white solution. Subsequently, aqueous solution (10 mL) of NaF (10 mL, 0.625 M) was added and stirred for 1 h, resulting in a complex with the lanthanide/ sodium citrate/ NaF molar ratio being 1/90/12. Then,  $\text{HNO}_3$  was added to adjust the pH of the solution to 3. The obtained solution was then transferred into a 50 mL autoclave and hydrothermally treated at 180 °C for 2 h. After cooling to room temperature, products were separated by centrifugation and washed with ethanol for three times and then dried at 60 °C in vacuum.

### 1.2 Structural characterizations

X-ray diffraction (XRD) pattern of the dry powder was obtained on a RIGAKU D/MAX 2550/PC diffractometer (Japan) with a slit of  $0.02^\circ$  at a scanning rate of  $5^\circ \text{ min}^{-1}$  using  $\text{Cu K}\alpha$  radiation ( $\lambda = 1.5406 \text{ \AA}$ ). Scanning Electron Microscopy (SEM) analysis was performed on a Field Emission Scanning Electron Microscopy (FESEM) (ZEISS SU-8010). High-resolution

Transmission Electron Microscopy (HRTEM) analysis was performed on a FEG-TEM (Tecnai G2 F30 S-Twin, Philips-FEI, Netherlands) operated at 300 kV.

## 2. Supplementary date

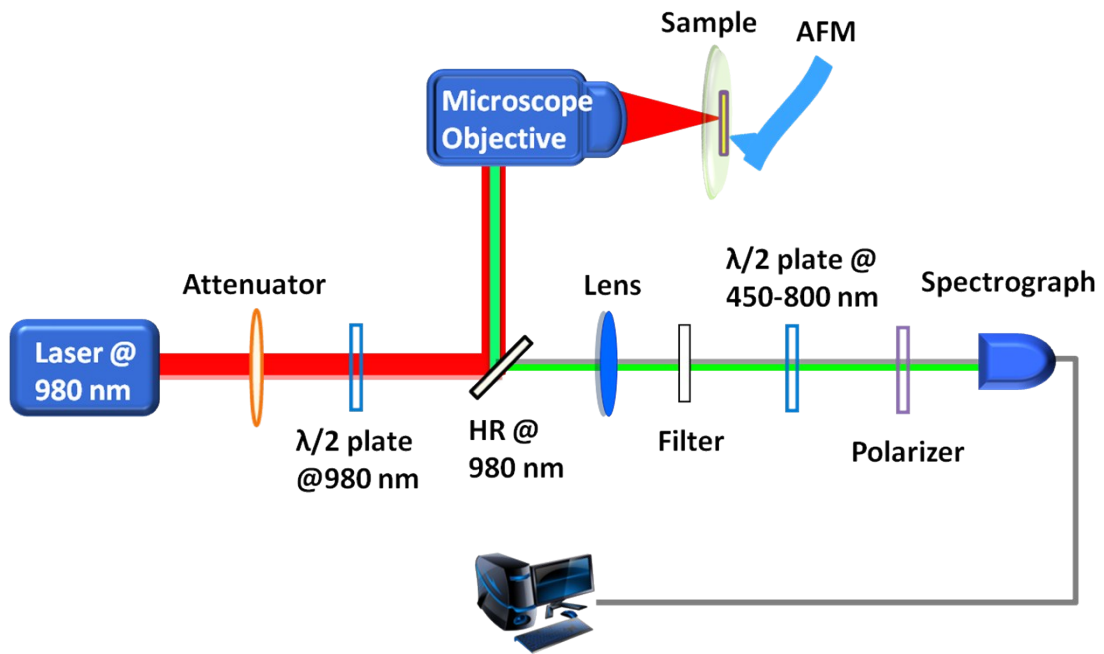

**Fig. S1** Schematic diagram of luminescence spectrum test system.

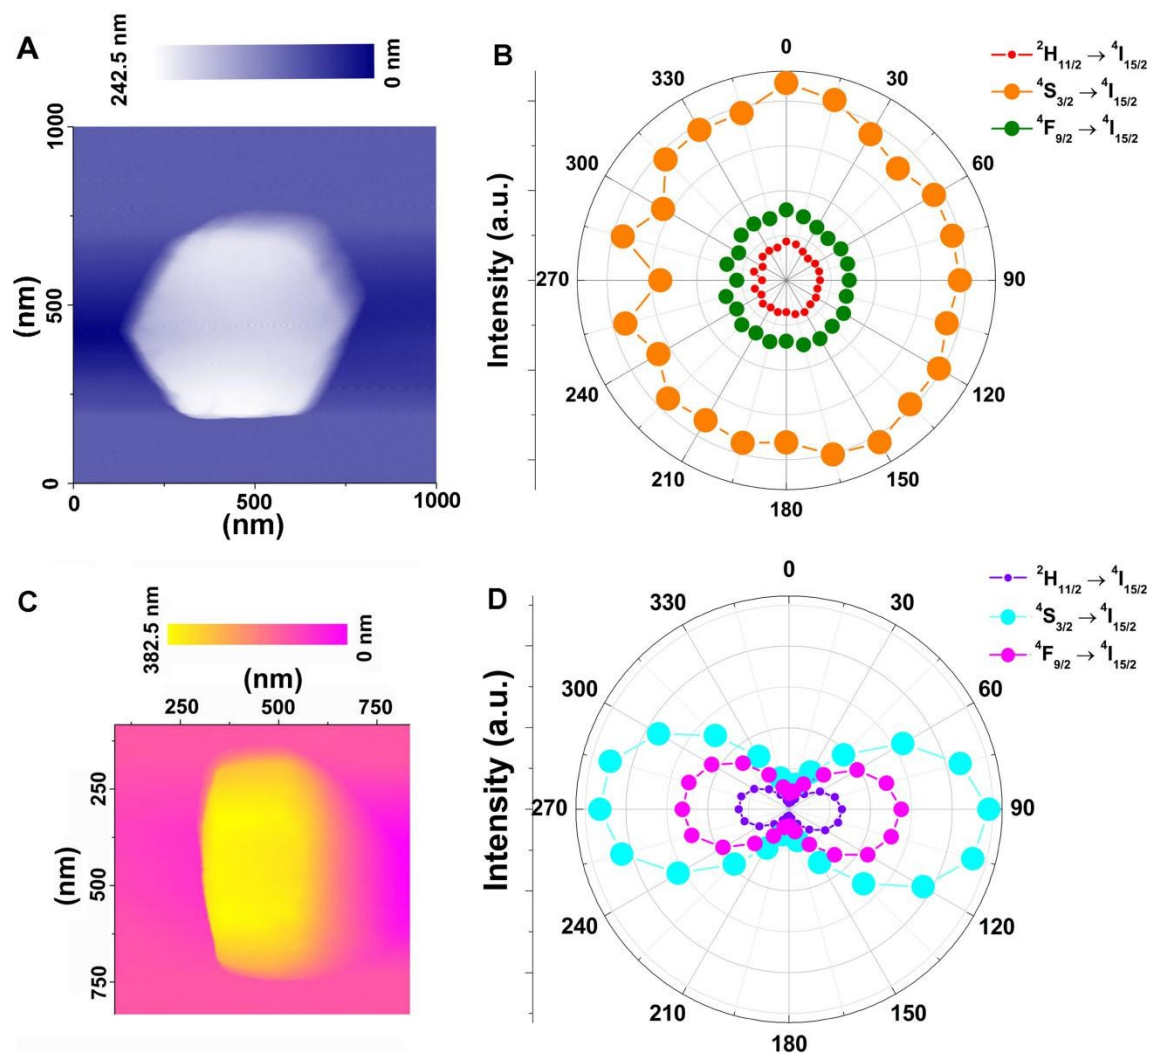

**Fig. S2** A) AFM images of single nanodisk recorded for a single nanodisk in which the  $a$  axis is parallel to the horizontal plane (HP). B) Polar plots of integrated UC luminescence intensity of single nanodisk as a function of excitation polarization angle for the transitions from  ${}^2\text{H}_{11/2} \rightarrow {}^4\text{I}_{15/2}$ ,  ${}^4\text{S}_{3/2} \rightarrow {}^4\text{I}_{15/2}$ ,  ${}^4\text{F}_{9/2} \rightarrow {}^4\text{I}_{15/2}$  of  $\text{Er}^{3+}$ , recorded at  $a \parallel \text{HP}$  and  $E_{ex} \parallel a$  axis @  $\theta = 0^\circ$ . C) AFM images of single nanodisk recorded for a single nanodisk in which the  $c$  axis is parallel to HP. D) Polar plots of integrated UC luminescence intensity of single nanodisk as a function of excitation polarization angle for the transitions from  ${}^2\text{H}_{11/2} \rightarrow {}^4\text{I}_{15/2}$ ,  ${}^4\text{S}_{3/2} \rightarrow {}^4\text{I}_{15/2}$ ,  ${}^4\text{F}_{9/2} \rightarrow {}^4\text{I}_{15/2}$  of  $\text{Er}^{3+}$ , recorded at  $c \parallel \text{HP}$  and  $E_{ex} \parallel c$  axis @  $\theta = 0^\circ$ .

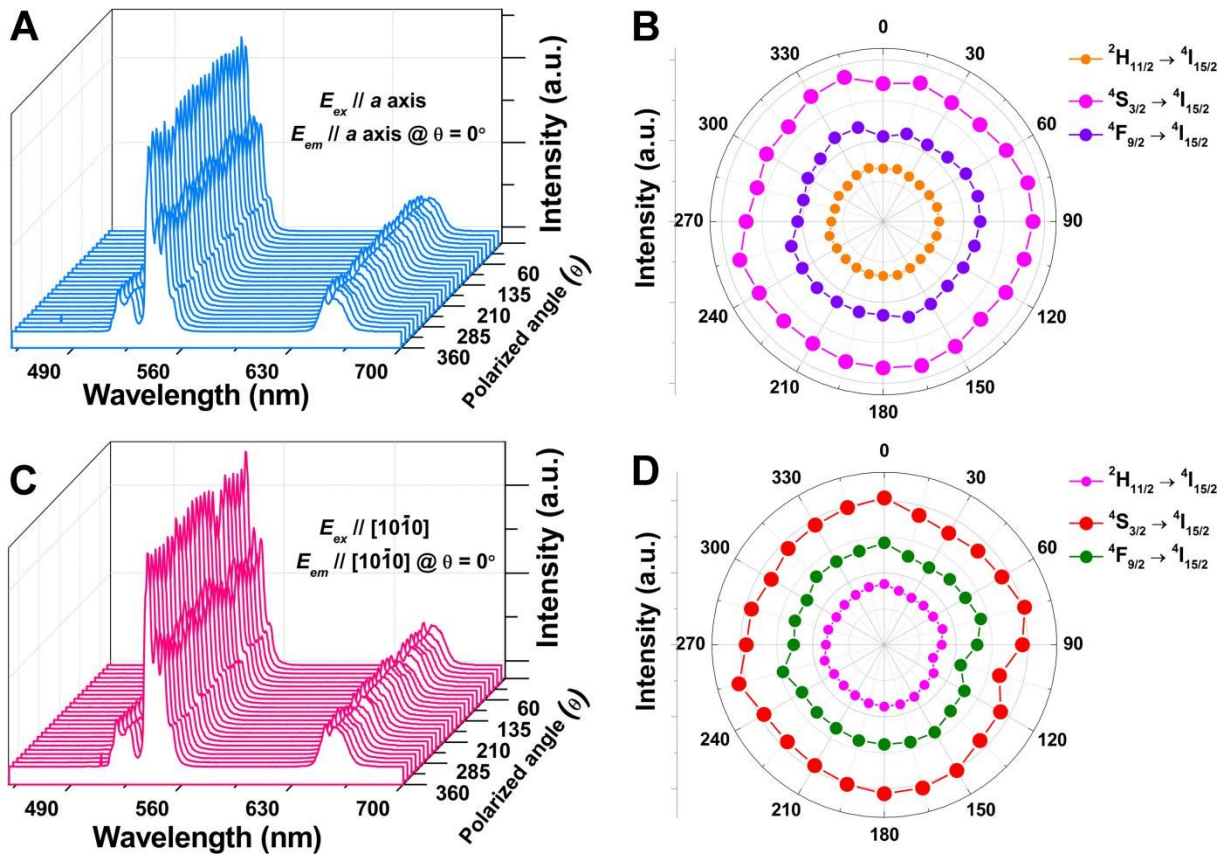

**Fig. S3** A) UC luminescence spectra recorded at emission polarization angles of  $0^\circ - 360^\circ$  for single nanodisk under conditions of  $a \parallel \text{HP}$  and  $E_{ex} \parallel a$ . B) Polar plots of integrated UC luminescence intensity as a function of emission polarization angle for the transitions from  ${}^2\text{H}_{11/2} \rightarrow {}^4\text{I}_{15/2}$ ,  ${}^4\text{S}_{3/2} \rightarrow {}^4\text{I}_{15/2}$ ,  ${}^4\text{F}_{9/2} \rightarrow {}^4\text{I}_{15/2}$  of  $\text{Er}^{3+}$  for single nanodisk under configurations of  $a \parallel \text{HP}$  and  $E_{ex} \parallel a$ . C) UC luminescence spectra recorded at emission polarization angles of  $0^\circ - 360^\circ$  for single nanodisk under conditions of  $a \parallel \text{HP}$  and  $E_{ex} \parallel [10\bar{1}0]$ . D) Polar plots of integrated UC luminescence intensity as a function of emission polarization angle for the transitions from  ${}^2\text{H}_{11/2} \rightarrow {}^4\text{I}_{15/2}$ ,  ${}^4\text{S}_{3/2} \rightarrow {}^4\text{I}_{15/2}$ ,  ${}^4\text{F}_{9/2} \rightarrow {}^4\text{I}_{15/2}$  of  $\text{Er}^{3+}$  for single nanodisk under configurations of  $a \parallel \text{HP}$  and  $E_{ex} \parallel [10\bar{1}0]$ .

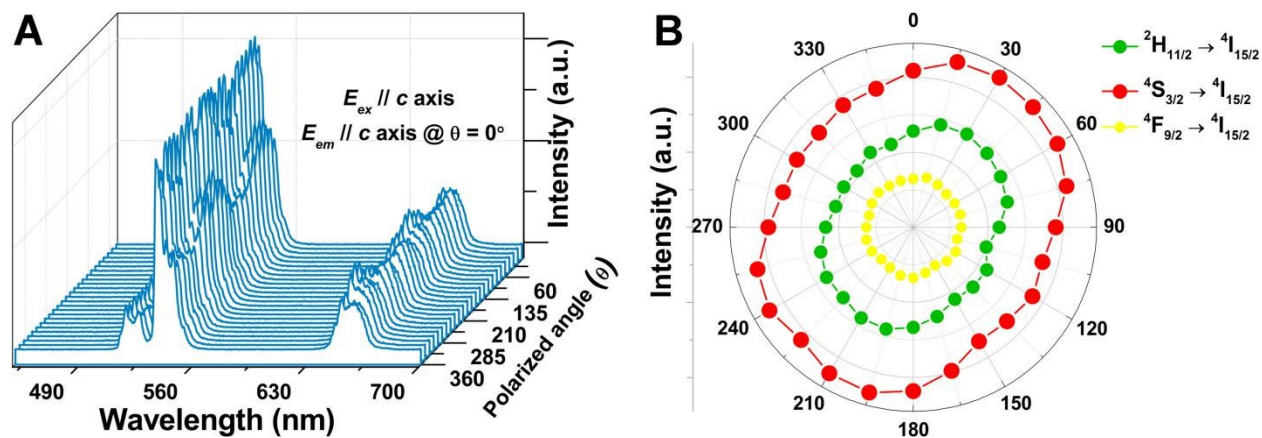

**Fig. S4** A) UC luminescence spectra recorded at emission polarization angles of  $0^\circ - 360^\circ$  for single nanodisk under conditions of  $c // HP$  and  $E_{ex} // c$ . B) Polar plots of integrated UC luminescence intensity as a function of emission polarization angle for the transitions from  ${}^2H_{11/2} \rightarrow {}^4I_{15/2}$ ,  ${}^4S_{3/2} \rightarrow {}^4I_{15/2}$ ,  ${}^4F_{9/2} \rightarrow {}^4I_{15/2}$  of  $Er^{3+}$  for single nanodisk under configurations of  $c // HP$  and  $E_{ex} // c$ .

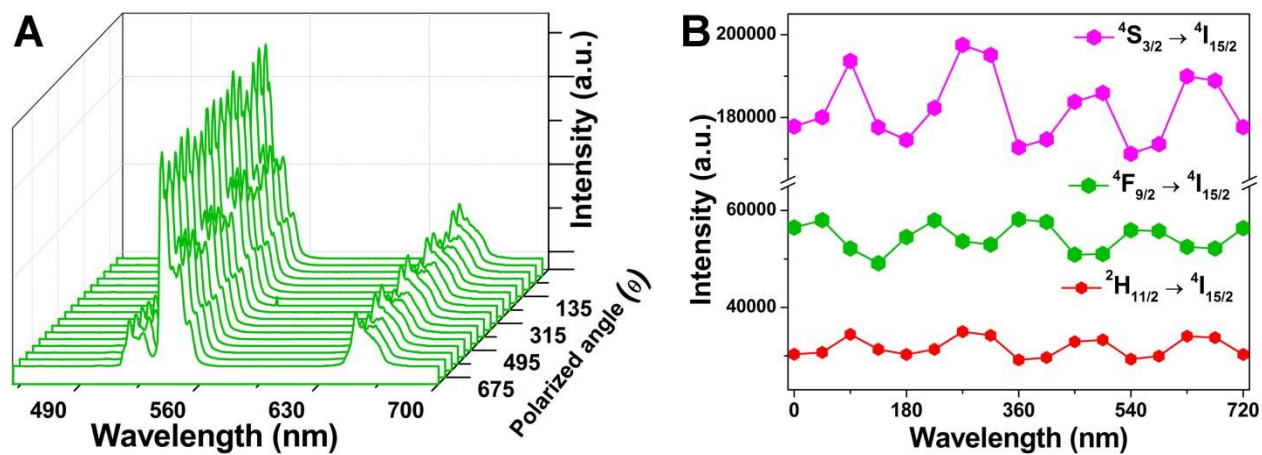

**Fig. S5** A) UC luminescence spectra of the aggregated nanodisks recorded under emission polarization angle varied from  $0^\circ$  to  $360^\circ$ . C) The dependence of UC luminescence intensity of the aggregated nanodisks with different transitions of  $\text{Er}^{3+}$  on the emission polarization angle.



## Reference

1. L. Liang, Y. Liu, C. Bu, K. Guo, W. Sun, N. Huang, T. Peng, B. Sebo, M. Pan, W. Liu, *et. al.* *Adv. Mater.*, 2013, **25**, 2174.
